# Supplementary material for: An Assessment of the Oral and Inhalation Acute Toxicity of Nickel Oxide Nanoparticles in Rats
Source: MDPI journal article supplement (doi:10.3390/nano13020261), 2023-01-07
Supplement: s1 [file s1]

**ACUTE ORAL DATA - Individual Animal Body Weight**

**Table S1.** Individual body weight observations following acute oral exposure to nickel oxide nanoparticles

| Animal   | Dose Level<br>(mg/kg) | Body Weight (g) |       |        |
|----------|-----------------------|-----------------|-------|--------|
|          |                       | Initial         | Day 7 | Day 14 |
| Female 1 | 175                   | 223.8           | 253.7 | 272.9  |
| Female 2 | 550                   | 229.2           | 248.7 | 280.7  |
| Female 3 | 1750                  | 217.4           | 236.7 | 271.4  |
| Female 4 | 5000                  | 214.7           | 246.5 | 282.6  |
| Female 5 | 5000                  | 205.5           | 236.7 | 254.8  |
| Female 6 | 5000                  | 210.5           | 241.6 | 251.2  |

**Table S2.** Individual body weight observations following acute oral exposure to nickel oxide micron particles (Henderson et al 2012)

| Animals and<br>Dosing Sequence <sup>1</sup> | Dose Level<br>(mg/kg) | Body Weight (g) |       |        |
|---------------------------------------------|-----------------------|-----------------|-------|--------|
|                                             |                       | Initial         | Day 7 | Day 14 |
| Female 1                                    | 5,000                 | 200             | 241   | 273    |
| Female 2                                    | 6,300                 | 208             | 230   | 274    |
| Female 3                                    | 7,930                 | 200             | 254   | 267    |
| Female 8                                    | 7,930                 | 198             | 234   | 248    |
| Female 10                                   | 7,930                 | 180             | 228   | 248    |
| Female 4                                    | 9,990                 | 175             | 178   | 232    |
| Female 7                                    | 9,990                 | 194             | -     | -      |
| Female 9                                    | 9,990                 | 185             | -     | -      |
| Female 11                                   | 9,990                 | 200             | 224   | 244    |
| Female 5                                    | 11,000                | 179             | -     | -      |
| Female 6                                    | 11,000                | 171             | -     | -      |

<sup>1</sup>Listed in order of increasing dose level instead of dosing sequence for easier comparison of results. Dosing sequence was based on the survival of the previous animal, according to the acute oral toxicity Up and Down Procedure.

**Supplemental Information**  
**For Manuscript: An Assessment of the Oral and Inhalation Acute Toxicity of Nickel Oxide Nanoparticles in Rats**

---

**ACUTE ORAL DATA - Individual Animal In-Life Behavioral and Necropsy Observations**

**Table S3.** Individual in-life behavioral and necropsy observations following acute oral exposure to nickel oxide nanoparticles

|                        | <b>Individual Observations After Acute Oral Exposure to Nickel Oxide Nanoparticles</b> |                       |                         |              |              |              |              |              |              |              |              |              |               |               |               |               |               |                            |
|------------------------|----------------------------------------------------------------------------------------|-----------------------|-------------------------|--------------|--------------|--------------|--------------|--------------|--------------|--------------|--------------|--------------|---------------|---------------|---------------|---------------|---------------|----------------------------|
| <b>Animals</b>         | <b>In-Life</b>                                                                         |                       |                         |              |              |              |              |              |              |              |              |              |               |               |               |               |               | <b>Necropsy</b>            |
|                        | <b>Day 0<br/>½ hr</b>                                                                  | <b>Day 0<br/>3 hr</b> | <b>Day 0<br/>3.5 hr</b> | <b>Day 1</b> | <b>Day 2</b> | <b>Day 3</b> | <b>Day 4</b> | <b>Day 5</b> | <b>Day 6</b> | <b>Day 7</b> | <b>Day 8</b> | <b>Day 9</b> | <b>Day 10</b> | <b>Day 11</b> | <b>Day 12</b> | <b>Day 13</b> | <b>Day 14</b> | <b>Gross Abnormalities</b> |
| Female 1<br>175 mg/kg  | AH                                                                                     | -                     | AH                      | AH           | AH           | AH           | AH           | AH           | AH           | AH           | AH           | AH           | AH            | AH            | AH            | AH            | AH            | None                       |
| Female 2<br>550 mg/kg  | AH                                                                                     | -                     | AH                      | AH           | AH           | AH           | AH           | AH           | AH           | AH           | AH           | AH           | AH            | AH            | AH            | AH            | AH            | None                       |
| Female 3<br>1750 mg/kg | AH                                                                                     | AH                    | -                       | AH            | AH            | AH            | AH            | AH            | None                       |
| Female 4<br>5000 mg/kg | AH                                                                                     | AH                    | -                       | AH            | AH            | AH            | AH            | AH            | None                       |
| Female 5<br>5000 mg/kg | AH                                                                                     | -                     | AH                      | AH           | AH           | AH           | AH           | AH           | AH           | AH           | AH           | AH           | AH            | AH            | AH            | AH            | AH            | None                       |
| Female 6<br>5000 mg/kg | AH                                                                                     | -                     | AH                      | AH           | AH           | AH           | AH           | AH           | AH           | AH           | AH           | AH           | AH            | AH            | AH            | AH            | AH            | None                       |

AH: Active and healthy

**Supplemental Information**  
**For Manuscript: An Assessment of the Oral and Inhalation Acute Toxicity of Nickel Oxide Nanoparticles in Rats**

**Table S4.** Individual in-life behavioral and necropsy observations following acute oral exposure to nickel oxide micron particles (Henderson et al 2012)

| Animals <sup>1</sup>     | Individual Observations After Acute Oral Exposure to Nickel Oxide Micron Particles |       |       |          |       |       |       |       |       |       |        |        |        |        |        |                                    |
|--------------------------|------------------------------------------------------------------------------------|-------|-------|----------|-------|-------|-------|-------|-------|-------|--------|--------|--------|--------|--------|------------------------------------|
|                          | In-Life                                                                            |       |       |          |       |       |       |       |       |       |        |        |        |        |        | Necropsy                           |
|                          | Day 0                                                                              | Day 1 | Day 2 | Day 3    | Day 4 | Day 5 | Day 6 | Day 7 | Day 8 | Day 9 | Day 10 | Day 11 | Day 12 | Day 13 | Day 14 | Gross Abnormalities                |
| Female 1<br>5,000 mg/kg  | AH                                                                                 | AH    | AH    | AH       | AH    | AH    | AH    | AH    | AH    | AH    | AH     | AH     | AH     | AH     | AH     | None                               |
| Female 2<br>6,300 mg/kg  | AH                                                                                 | AH    | AH    | AH       | AH    | AH    | AH    | AH    | AH    | AH    | AH     | AH     | AH     | AH     | AH     | None                               |
| Female 3<br>7,930 mg/kg  | AH                                                                                 | AH    | AH    | AH       | AH    | AH    | AH    | AH    | AH    | AH    | AH     | AH     | AH     | AH     | AH     | None                               |
| Female 8<br>7,930 mg/kg  | AH                                                                                 | AH    | AH    | AH       | AH    | AH    | AH    | AH    | AH    | AH    | AH     | AH     | AH     | AH     | AH     | None                               |
| Female 10<br>7,930 mg/kg | AH                                                                                 | AH    | AH    | AH       | AH    | AH    | AH    | AH    | AH    | AH    | AH     | AH     | AH     | AH     | AH     | None                               |
| Female 4<br>9,990 mg/kg  | AH                                                                                 | AH    | AH    | AH       | AH    | RF    | RF    | AH    | AH    | AH    | AH     | AH     | AH     | AH     | AH     | None                               |
| Female 7<br>9,990 mg/kg  | AH                                                                                 | AH    | RF    | AH       | -     | -     | -     | -     | -     | -     | -      | -      | -      | -      | -      | Intestines discolored<br>black/red |
| Female 9<br>9,990 mg/kg  | AH                                                                                 | AH    | RF    | RF<br>FS | -     | -     | -     | -     | -     | -     | -      | -      | -      | -      | -      | Intestines discolored<br>black/red |
| Female 11<br>9,990 mg/kg | AH                                                                                 | AH    | RF    | RF       | RF    | AH    | AH    | AH    | AH    | AH    | AH     | AH     | AH     | AH     | AH     | None                               |
| Female 5<br>11,000 mg/kg | AH                                                                                 | AH    | AH    | AH       | -     | -     | -     | -     | -     | -     | -      | -      | -      | -      | -      | Intestines discolored<br>black/red |
| Female 6<br>11,000 mg/kg | AH                                                                                 | AH    | AH    | RF<br>HO | -     | -     | -     | -     | -     | -     | -      | -      | -      | -      | -      | Intestines discolored<br>black/red |

AH: Active and healthy; RF: reduced fecal volume; FS: facial staining; HO: hypoactivity; AG: ano-genital staining

<sup>1</sup> Listed in order of increasing dose level instead of dosing sequence for easier comparison of results. Dosing sequence was based on the survival of the previous animal, according to the acute oral toxicity Up and Down Procedure.

**Supplemental Information**  
**For Manuscript: An Assessment of the Oral and Inhalation Acute Toxicity of Nickel Oxide Nanoparticles in Rats**

---

**ACUTE INHALATION DATA - Individual Animal Body Weight**

**Table S5.** Individual body weight observations following acute inhalation exposure to nickel oxide nanoparticles

| Exposure Conc. | Animals  | Individual Body Weight (g) |       |       |       |        |
|----------------|----------|----------------------------|-------|-------|-------|--------|
|                |          | Initial                    | Day 1 | Day 3 | Day 7 | Day 14 |
| 5.0 mg/L       | Male 1   | 382.4                      | 382.7 | 361.7 | 349.2 | 381.0  |
|                | Male 2   | 437.4                      | 421.8 | 409.2 | 399.2 | 438.7  |
|                | Male 3   | 462.5                      | 461.5 | 442.9 | 438.0 | 470.0  |
|                | Male 4   | 437.6                      | 432.9 | 433.7 | 405.2 | 456.7  |
|                | Male 5   | 419.9                      | 416.4 | 413.3 | 386.2 | 411.9  |
|                | Male 6   | 424.5                      | 421.1 | 414.9 | 409.8 | 434.3  |
|                | Male 7   | 452.2                      | 455.7 | 447.5 | 432.3 | 454.7  |
|                | Male 8   | 450.8                      | 454.1 | 456.6 | 461.8 | 476.2  |
|                | Male 9   | 428.1                      | 423.5 | 385.6 | 388.2 | 443.8  |
|                | Male 10  | 417.2                      | 404.8 | 396.0 | 367.0 | 408.7  |
|                | Male 11  | 380.3                      | 378.2 | 397.6 | 405.4 | 452.2  |
|                | Male 12  | 350.3                      | 340.6 | 322.6 | 334.7 | 395.1  |
|                | Male 13  | 375.1                      | 368.7 | 365.3 | 386.6 | 415.6  |
|                | Male 14  | 362.9                      | 355.5 | 349.3 | 336.5 | 383.4  |
|                | Male 15  | 408.3                      | 405.5 | 383.3 | 402.9 | 446.5  |
|                | Male 16  | 420.5                      | 407.6 | 380.1 | 383.2 | 430.6  |
|                | Male 17  | 356.5                      | 349.0 | 334.5 | 296.7 | 370.4  |
|                | Male 18  | 320.6                      | 314.1 | 310.1 | 358.1 | 340.7  |
|                | Male 19  | 393.9                      | 389.9 | 386.3 | 368.3 | 409.0  |
|                | Male 20  | 415.5                      | 413.6 | 396.4 | 368.9 | 436.7  |
|                | Female 1 | 248.2                      | 249.0 | 248.5 | 258.9 | 276.2  |
|                | Female 2 | 254.6                      | 250.1 | 239.0 | 232.9 | 264.4  |
|                | Female 3 | 253.5                      | 248.1 | 236.8 | 240.3 | 257.7  |
|                | Female 4 | 259.9                      | 256.2 | 263.7 | 273.2 | 276.2  |
|                | Female 5 | 260.0                      | 258.8 | 272.0 | 270.8 | 286.0  |
|                | Female 6 | 234.1                      | 226.8 | 222.1 | 236.4 | 245.0  |
|                | Female 7 | 242.3                      | 237.7 | 251.5 | 257.4 | 261.6  |
|                | Female 8 | 253.6                      | 246.1 | 255.9 | 250.1 | 258.9  |
|                | Female 9 | 241.1                      | 232.8 | 233.3 | 235.0 | 250.7  |

### Supplemental Information

For Manuscript: An Assessment of the Oral and Inhalation Acute Toxicity of Nickel Oxide Nanoparticles in Rats

---

|  |           |       |       |       |       |       |
|--|-----------|-------|-------|-------|-------|-------|
|  | Female 10 | 236.5 | 231.3 | 223.1 | 226.2 | 246.5 |
|  | Female 11 | 270.3 | 270.4 | 264.6 | 271.0 | 298.8 |
|  | Female 12 | 244.7 | 238.4 | 237.1 | 243.0 | 254.7 |
|  | Female 13 | 241.0 | 235.7 | 232.6 | 238.7 | 256.0 |
|  | Female 14 | 242.0 | 238.5 | 238.2 | 221.0 | 245.7 |
|  | Female 15 | 245.5 | 241.6 | 230.7 | 239.3 | 266.7 |
|  | Female 16 | 232.7 | 226.8 | 218.2 | 217.6 | 247.3 |
|  | Female 17 | 234.2 | 225.8 | 216.1 | 227.8 | 243.0 |
|  | Female 18 | 202.7 | 197.5 | 188.5 | 193.2 | 203.4 |
|  | Female 19 | 247.1 | 248.2 | 247.7 | 257.5 | 265.2 |
|  | Female 20 | 263.3 | 259.1 | 255.6 | 253.5 | 276.5 |

# Supplemental Information

## For Manuscript: An Assessment of the Oral and Inhalation Acute Toxicity of Nickel Oxide Nanoparticles in Rats

**Table S6.** Individual body weight observations following acute inhalation exposure to nickel oxide micron particles

| Exposure Conc. | Animals  | Individual Body Weight (g) |       |       |       |        |
|----------------|----------|----------------------------|-------|-------|-------|--------|
|                |          | Initial                    | Day 1 | Day 3 | Day 7 | Day 14 |
| 5.0 mg/L       | Male 1   | 258                        | NR    | NR    | 247   | 316    |
|                | Male 2   | 263                        | NR    | NR    | 202   | 298    |
|                | Male 3   | 269                        | NR    | NR    | 263   | 339    |
|                | Male 4   | 277                        | NR    | NR    | 259   | 349    |
|                | Male 5   | 257                        | NR    | NR    | 225   | 308    |
|                | Female 1 | 180                        | NR    | NR    | 182   | 218    |
|                | Female 2 | 195                        | NR    | NR    | 200   | 235    |
|                | Female 3 | 211                        | NR    | NR    | 203   | 243    |
|                | Female 4 | 197                        | NR    | NR    | 200   | 235    |
|                | Female 5 | 202                        | NR    | NR    | 202   | 239    |
| 8 mg/L         | Male 1   | 229                        | 226   | 223   | 193   | 255    |
|                | Male 2   | 222                        | 206   | 204   | 182   | 184    |
|                | Male 3   | 245                        | 220   | 204   | 187   | 176    |
|                | Male 4   | 229                        | 218   | 202   | 215   | 269    |
|                | Male 5   | 246                        | 232   | 230   | 246   | 288    |
|                | Female 1 | 172                        | 160   | 154   | 143   | 186    |
|                | Female 2 | 158                        | 148   | 140   | 139   | 178    |
|                | Female 3 | 160                        | 152   | 147   | 133   | 183    |
|                | Female 4 | 169                        | 160   | 153   | 145   | 178    |
|                | Female 5 | 167                        | 155   | 144   | 133   | 166    |

NR: not recorded

**For Manuscript: An Assessment of the Oral and Inhalation Acute Toxicity of Nickel Oxide Nanoparticles in Rats**

**Table S7.** Individual in-life behavioral and necropsy observations following acute inhalation exposure to nickel oxide nanoparticles

[illegible]

## Supplemental Information

### For Manuscript: An Assessment of the Oral and Inhalation Acute Toxicity of Nickel Oxide Nanoparticles in Rats

|  |           |    |    |    |    |    |    |    |    |    |    |    |    |    |    |    |    |    |                                      |
|--|-----------|----|----|----|----|----|----|----|----|----|----|----|----|----|----|----|----|----|--------------------------------------|
|  | Female 10 | IR | IR | IR | IR | IR | AH | AH | IR | AH | None                                 |
|  | Female 11 | IR | Lungs slightly discolored, red       |
|  | Female 12 | IR | Lungs moderately discolored, red     |
|  | Female 13 | IR | Lungs slightly discolored, spotted   |
|  | Female 14 | IR | Lungs moderately discolored, red     |
|  | Female 15 | IR | Lungs slightly discolored, spotted   |
|  | Female 16 | IR | Lungs slightly discolored, red       |
|  | Female 17 | IR | Lungs moderately discolored, red     |
|  | Female 18 | IR | Lungs moderately discolored, red     |
|  | Female 19 | IR | Lungs moderately discolored, spotted |
|  | Female 20 | IR | Lungs moderately discolored, spotted |

IR: Irregular respiration; AH: Active and healthy

<sup>1</sup> Day 0 (CR) represents removal from the exposure tube following exposure

<sup>2</sup> Day 0 (1 hr) represents 1 hour after exposure

<sup>3</sup> Day 0 (2 hr) represents 2 hours after exposure



# Supplemental Information

## For Manuscript: An Assessment of the Oral and Inhalation Acute Toxicity of Nickel Oxide Nanoparticles in Rats

**Table S8.** Individual in-life behavioral and necropsy observations following acute inhalation exposure to nickel oxide micron particles

| Exposure Conc. | Animals  | Individual Observations After Acute Inhalation Exposure to Nickel Oxide Micron Particles |                           |       |       |       |       |       |       |       |          |          |          |             |             |        |          |                                    |
|----------------|----------|------------------------------------------------------------------------------------------|---------------------------|-------|-------|-------|-------|-------|-------|-------|----------|----------|----------|-------------|-------------|--------|----------|------------------------------------|
|                |          | In-Life                                                                                  |                           |       |       |       |       |       |       |       |          |          |          |             |             |        | Necropsy |                                    |
|                |          | Day 0 CR <sup>1</sup>                                                                    | Day 0 (1 hr) <sup>2</sup> | Day 1 | Day 2 | Day 3 | Day 4 | Day 5 | Day 6 | Day 7 | Day 8    | Day 9    | Day 10   | Day 11      | Day 12      | Day 13 | Day 14   | Gross Abnormalities                |
| 5.0 mg/L       | Male 1   | AH                                                                                       | AH                        | AH    | AH    | AH    | AH    | AH    | AH    | AH    | AH       | AH       | AH       | AH          | AH          | AH     | AH       | None                               |
|                | Male 2   | AH                                                                                       | AH                        | AH    | AH    | AH    | AH    | AH    | AH    | AH    | AH       | AH       | AH       | AH          | AH          | AH     | AH       | None                               |
|                | Male 3   | AH                                                                                       | AH                        | AH    | AH    | AH    | AH    | AH    | AH    | AH    | HO       | HO       | HO       | AH          | AH          | AH     | AH       | None                               |
|                | Male 4   | AH                                                                                       | AH                        | AH    | AH    | AH    | AH    | AH    | AH    | AH    | HO       | HO       | HO       | AH          | AH          | AH     | AH       | None                               |
|                | Male 5   | AH                                                                                       | AH                        | AH    | AH    | AH    | AH    | AH    | AH    | AH    | HO       | HO       | HO       | HO          | AH          | AH     | AH       | None                               |
|                | Female 1 | AH                                                                                       | AH                        | AH    | AH    | AH    | AH    | AH    | AH    | AH    | AH       | AH       | AH       | AH          | AH          | AH     | AH       | None                               |
|                | Female 2 | AH                                                                                       | AH                        | AH    | AH    | AH    | AH    | AH    | AH    | AH    | AH       | AH       | AH       | AH          | AH          | AH     | AH       | None                               |
|                | Female 3 | AH                                                                                       | AH                        | AH    | AH    | AH    | AH    | AH    | AH    | AH    | AH       | AH       | AH       | AH          | AH          | AH     | AH       | None                               |
|                | Female 4 | AH                                                                                       | AH                        | AH    | AH    | AH    | AH    | AH    | AH    | AH    | AH       | AH       | AH       | AH          | AH          | AH     | AH       | None                               |
|                | Female 5 | AH                                                                                       | AH                        | AH    | AH    | AH    | AH    | AH    | AH    | AH    | AH       | AH       | AH       | AH          | AH          | AH     | AH       | None                               |
| 8.0 mg/L       | Male 1   | IR                                                                                       | IR                        | IR    | AH    | AH    | AH    | AH    | PP    | PP    | PP       | PP       | PP       | PP          | PP          | AH     | AH       | None                               |
|                | Male 2   | IR                                                                                       | IR                        | AH    | IR ND HO | IR ND HO | IR ND HO | IR ND HO RF | IR HO RF PP | IR RF  | AH       | None                               |
|                | Male 3   | IR                                                                                       | IR                        | AH    | AH    | AH    | AH    | AH    | AH    | PP    | PP       | IR PP    | IR PP    | IR PP RF    | IR PP RF    | PP     | PP       | Lungs, brown moderately dark spots |
|                | Male 4   | IR                                                                                       | IR                        | AH       | AH       | AH       | AH          | AH          | AH     | AH       | None                               |
|                | Male 5   | IR                                                                                       | IR                        | AH       | AH       | AH       | AH          | AH          | AH     | AH       | None                               |
|                | Female 1 | IR                                                                                       | IR                        | IR    | AH    | AH    | AH    | AH    | HO    | HO    | AH       | AH       | AH       | AH          | AH          | AH     | AH       | None                               |
|                | Female 2 | IR                                                                                       | IR                        | IR    | IR    | IR    | AH    | AH    | AH    | AH    | AH       | AH       | AH       | AH          | AH          | AH     | AH       | None                               |
|                | Female 3 | IR                                                                                       | IR                        | IR    | IR    | IR    | AH    | AH    | HO    | HO AG | AH       | AH       | AH       | AH          | AH          | AH     | AH       | None                               |
|                | Female 4 | IR                                                                                       | IR                        | AH       | AH       | AH       | AH          | AH          | AH     | AH       | None                               |
|                | Female 5 | IR                                                                                       | IR                        | AH    | AH    | AH    | AH    | AH    | AH    | HO    | HO       | AH       | AH       | AH          | AH          | AH     | AH       | None                               |

IR: irregular respiration; AH: active and healthy; PP: prolapsed penis; ND: nasal discharge (red); HO: hypoactivity; RF: reduced fecal volume; AG: ano-genital staining

<sup>1</sup> Day 0 (CR) represents removal from the exposure tube following exposure

<sup>2</sup> Day 0 (1 hr) represents 1 hour after exposure
